# Supplementary material for: Synthesis and NMR studies of malonyl-linked glycoconjugates of N-(2-aminoethyl)glycine. Building blocks for the construction of combinatorial glycopeptide libraries
Source: publisher site journal article supplement (doi:10.3762/bjoc.12.183), 2016-08-30
Supplement: Additional file 2 [file 1860-5397-12-183-S2.pdf]

## **Supporting Information**

for

# **Synthesis and NMR-studies of malonyl-linked glycoconjugates of *N*-(2-aminoethyl)glycine. Building blocks for the construction of combinatorial glycopeptide libraries**

Markus Nörrlinger, Sven Hafner and Thomas Ziegler<sup>\*</sup>

Address: Institute of Organic Chemistry, University of Tuebingen, Auf der Morgenstelle 18, 72076 Tuebingen, Germany

Email: Thomas Ziegler - [thomas.ziegler@uni-tuebingen.de](mailto:thomas.ziegler@uni-tuebingen.de)

<sup>\*</sup>Corresponding author

## **NMR spectra of building blocks 1a–d, 2a–d, 3, 4 and 7; 2D NMR spectra of building block 1a**

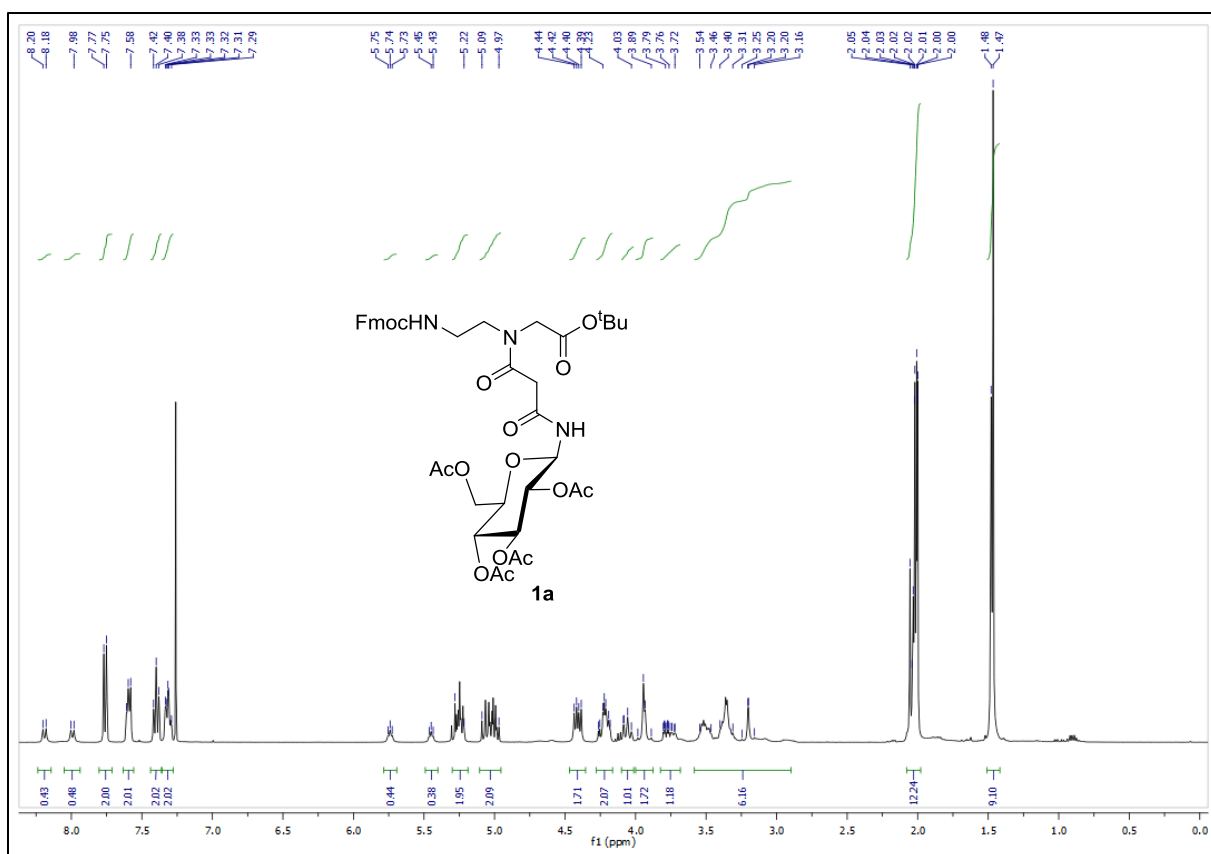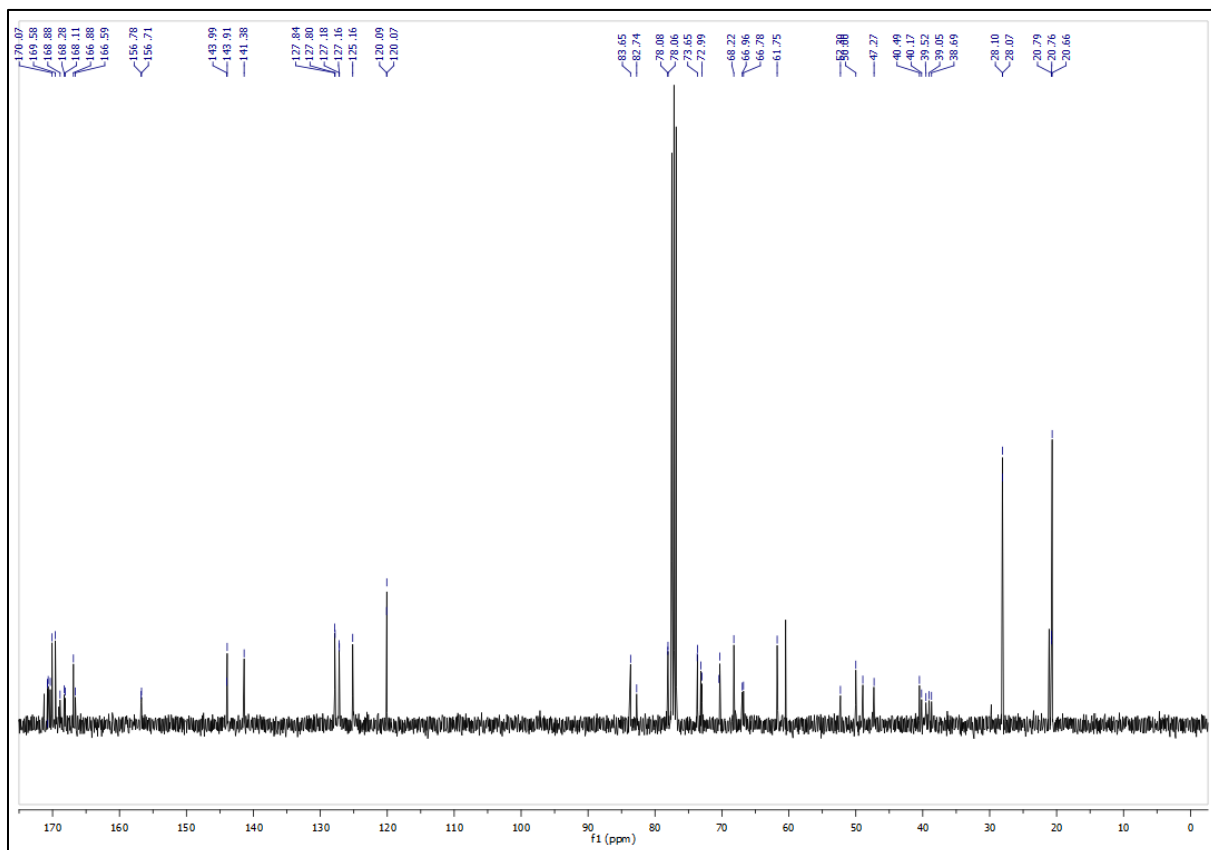



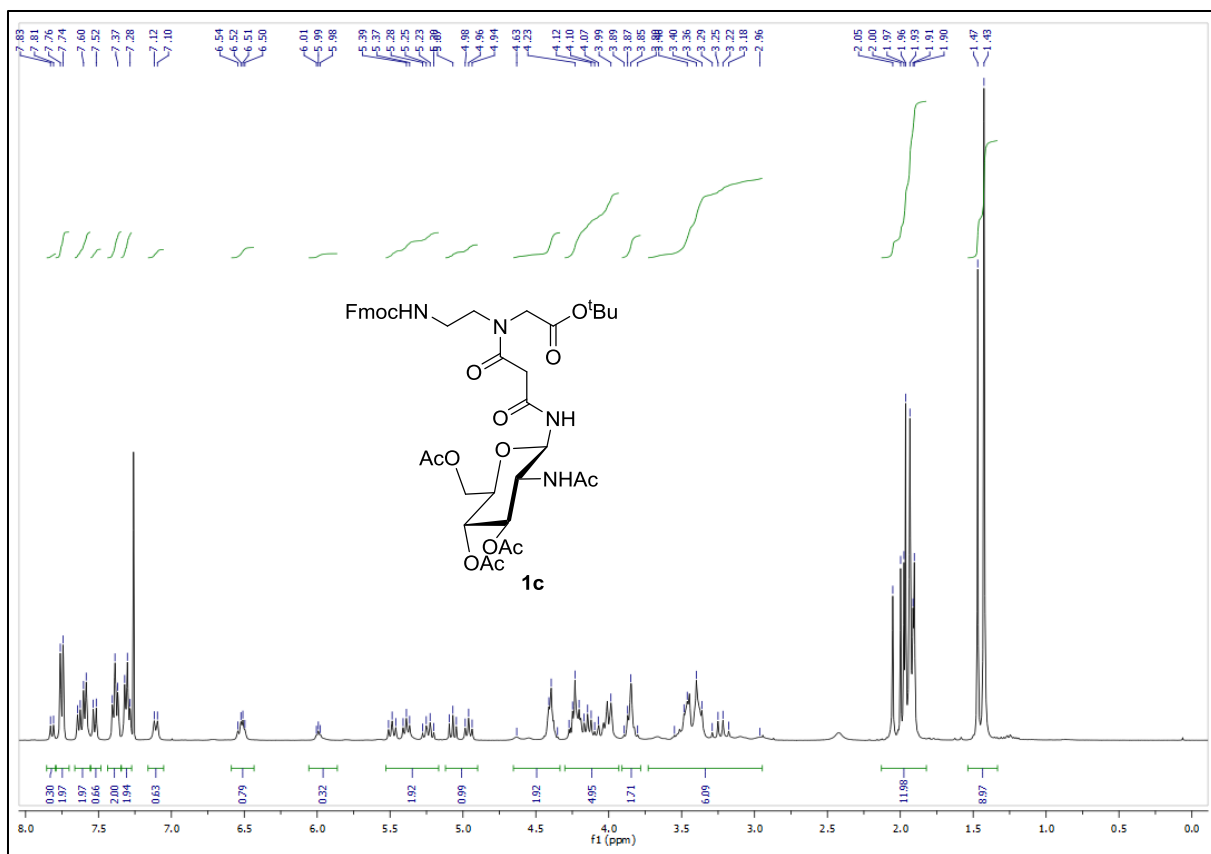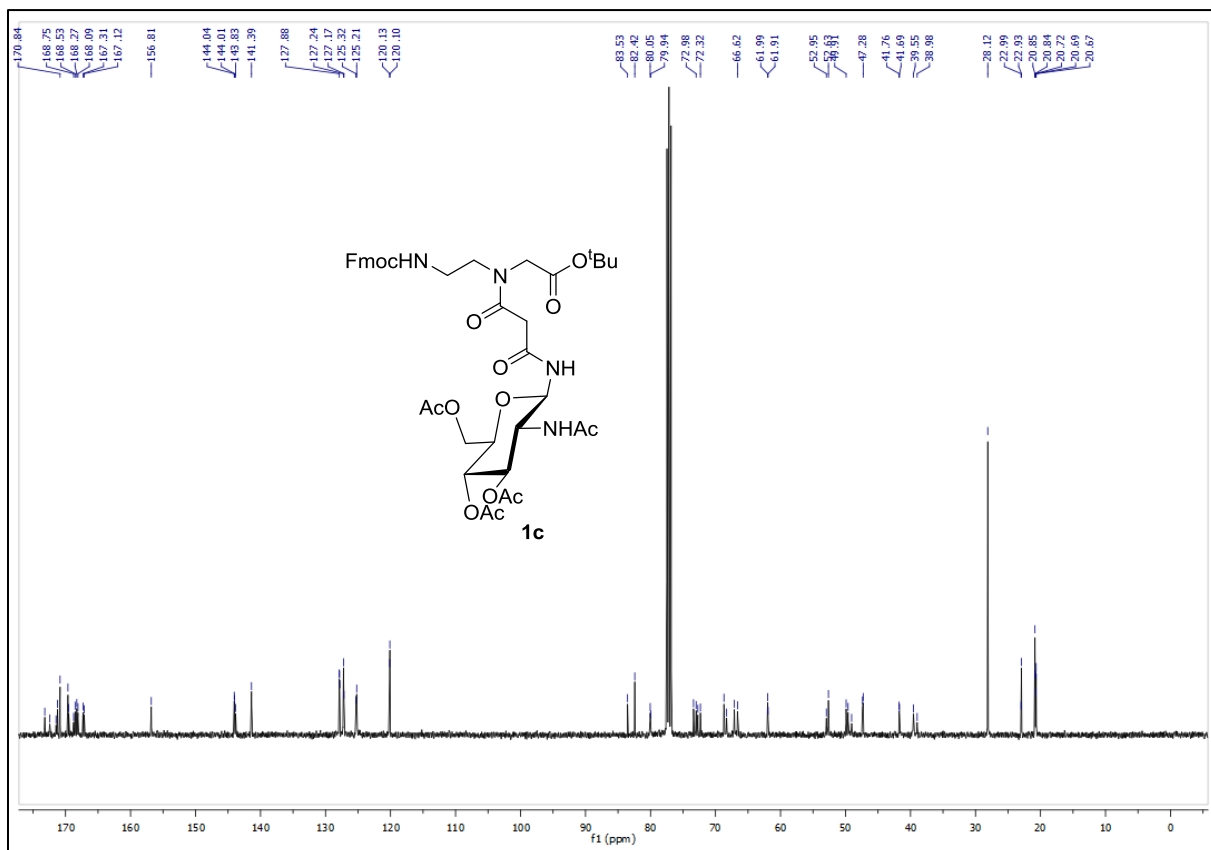

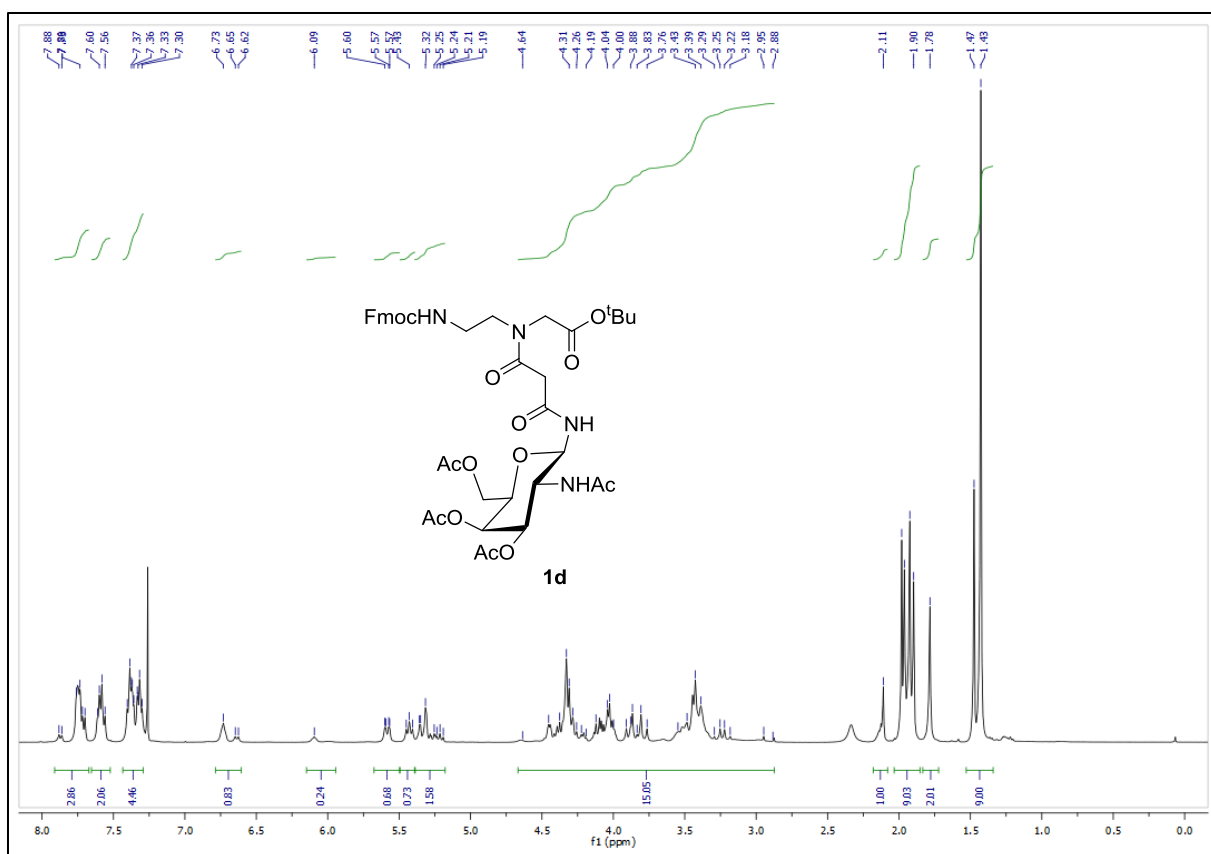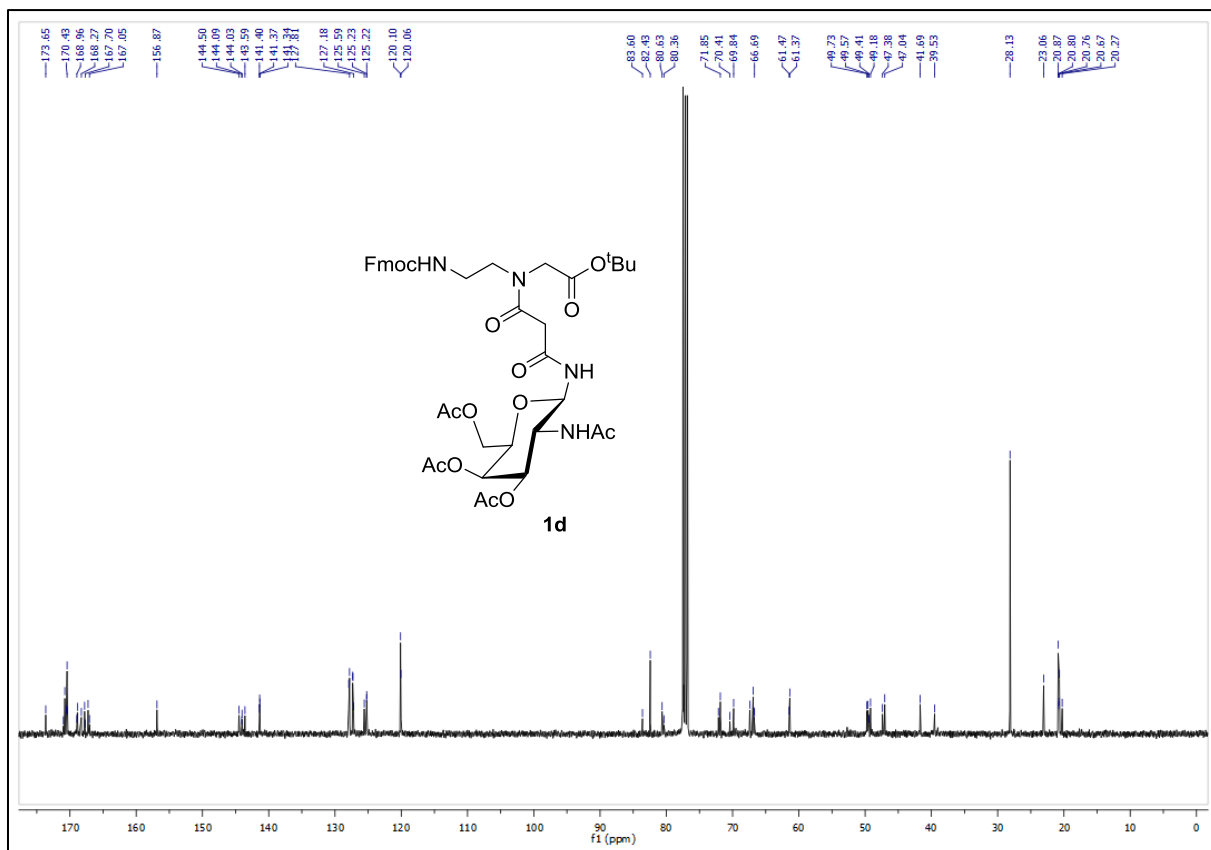

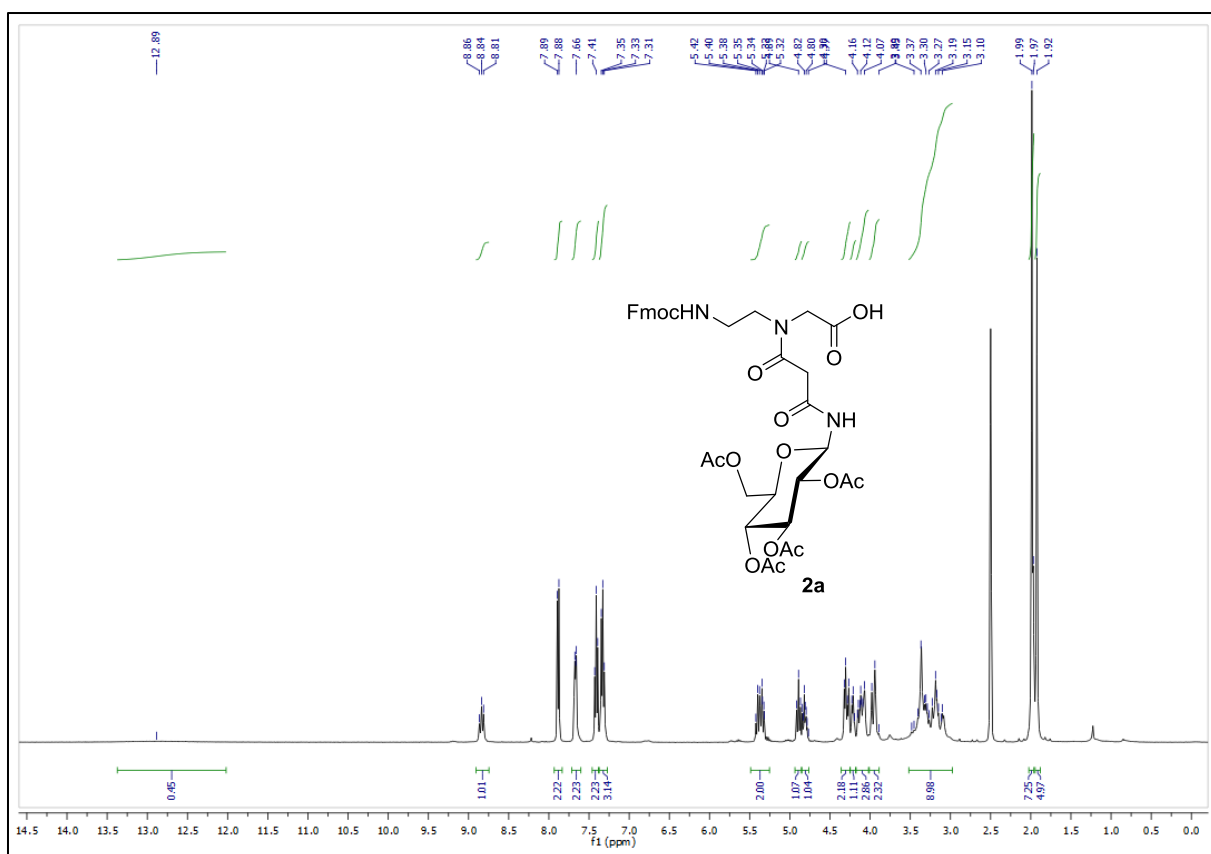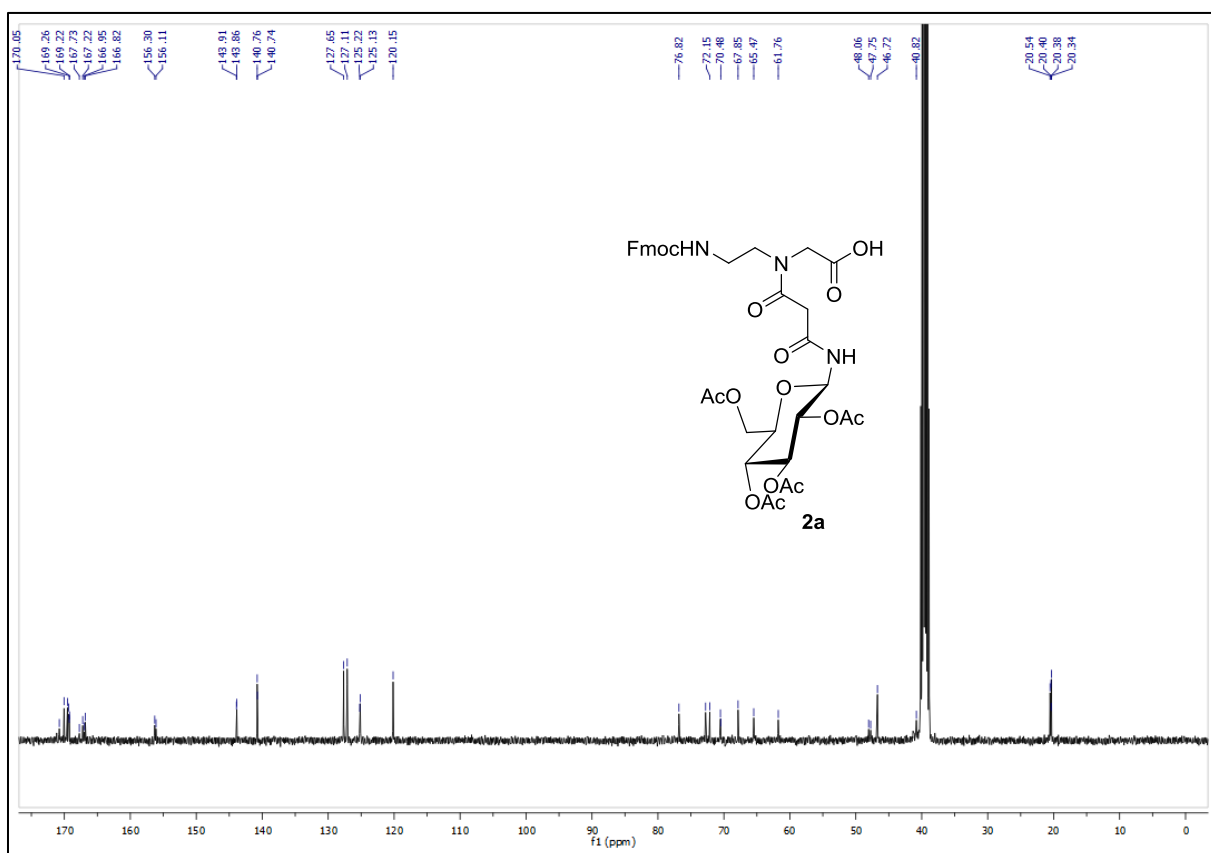

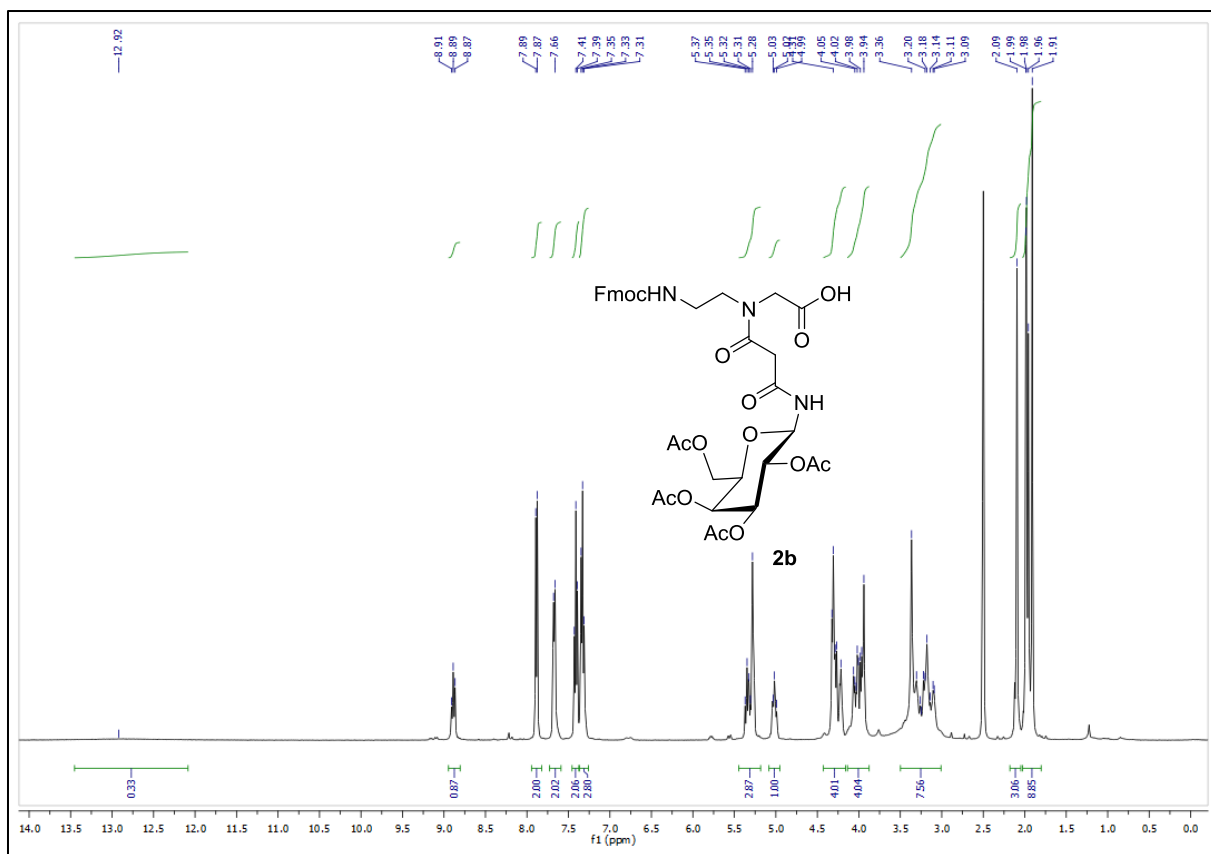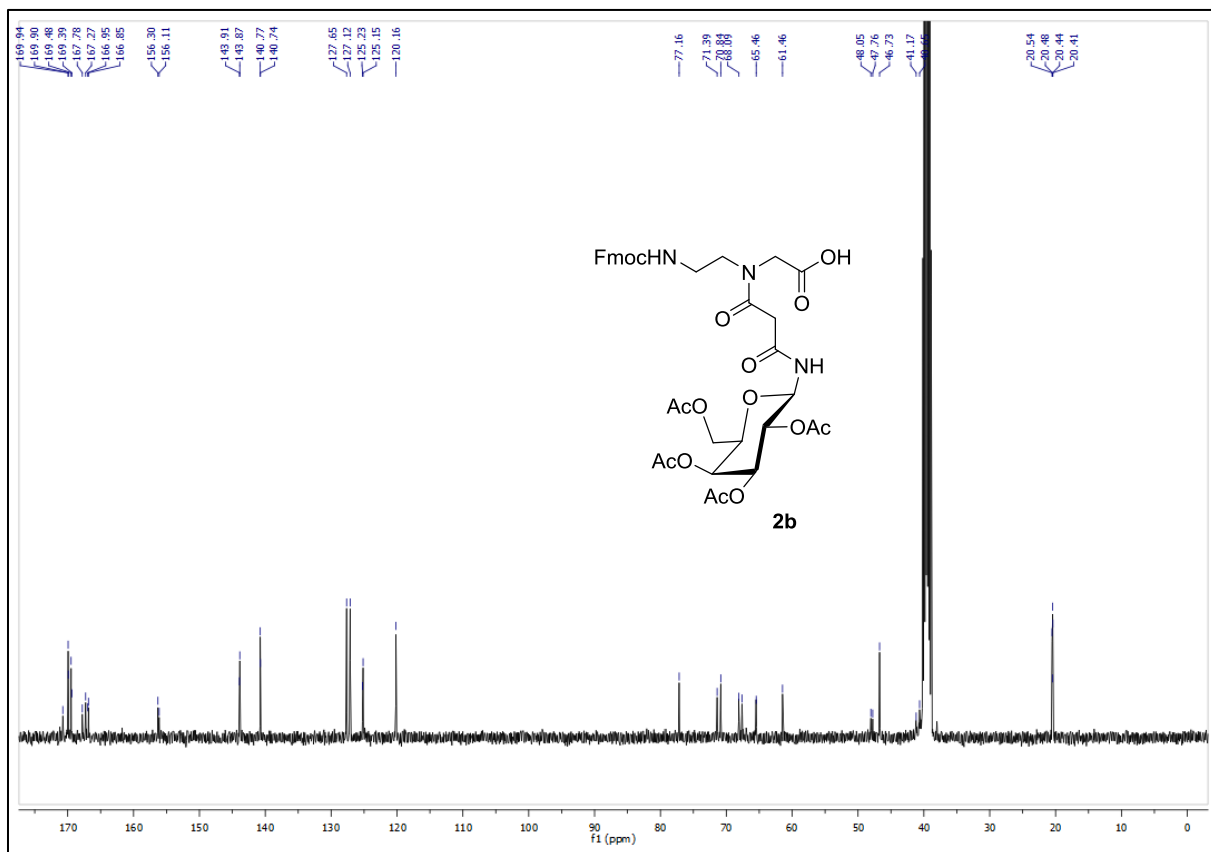

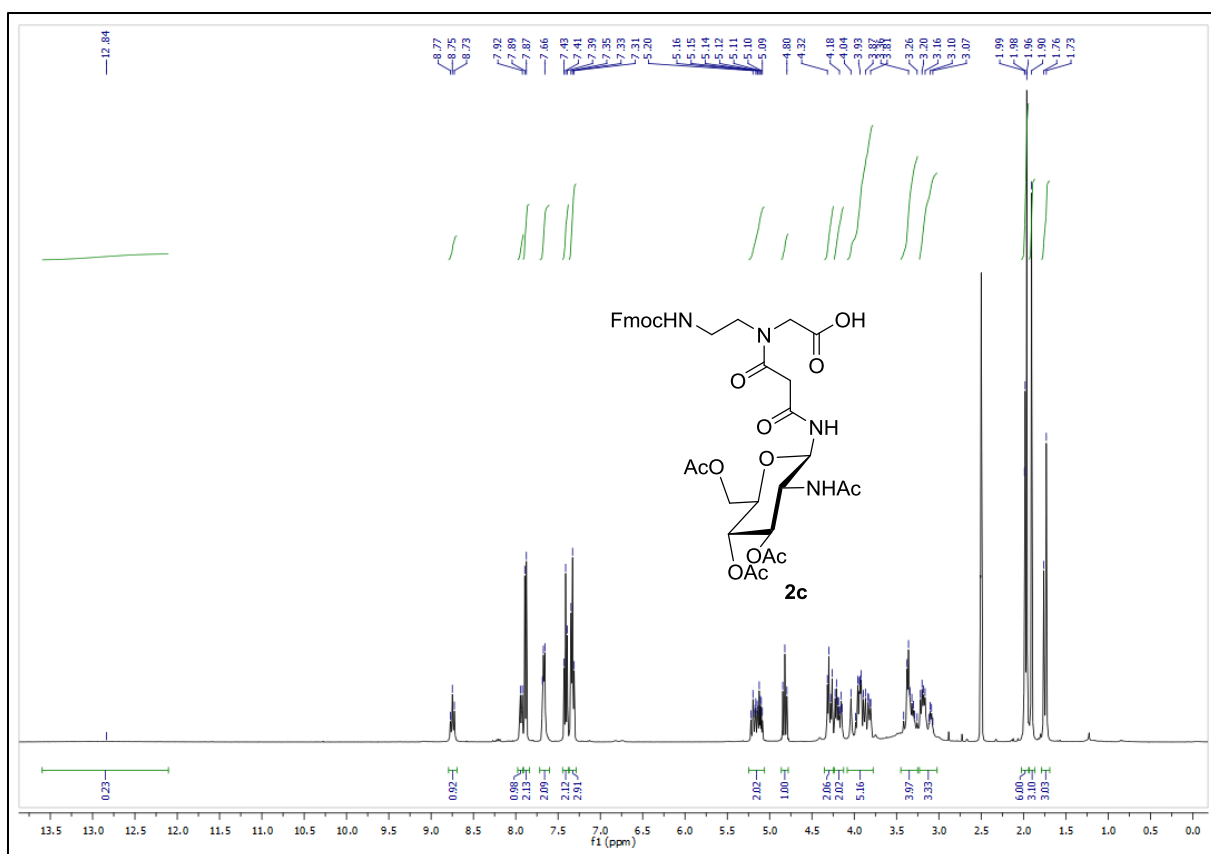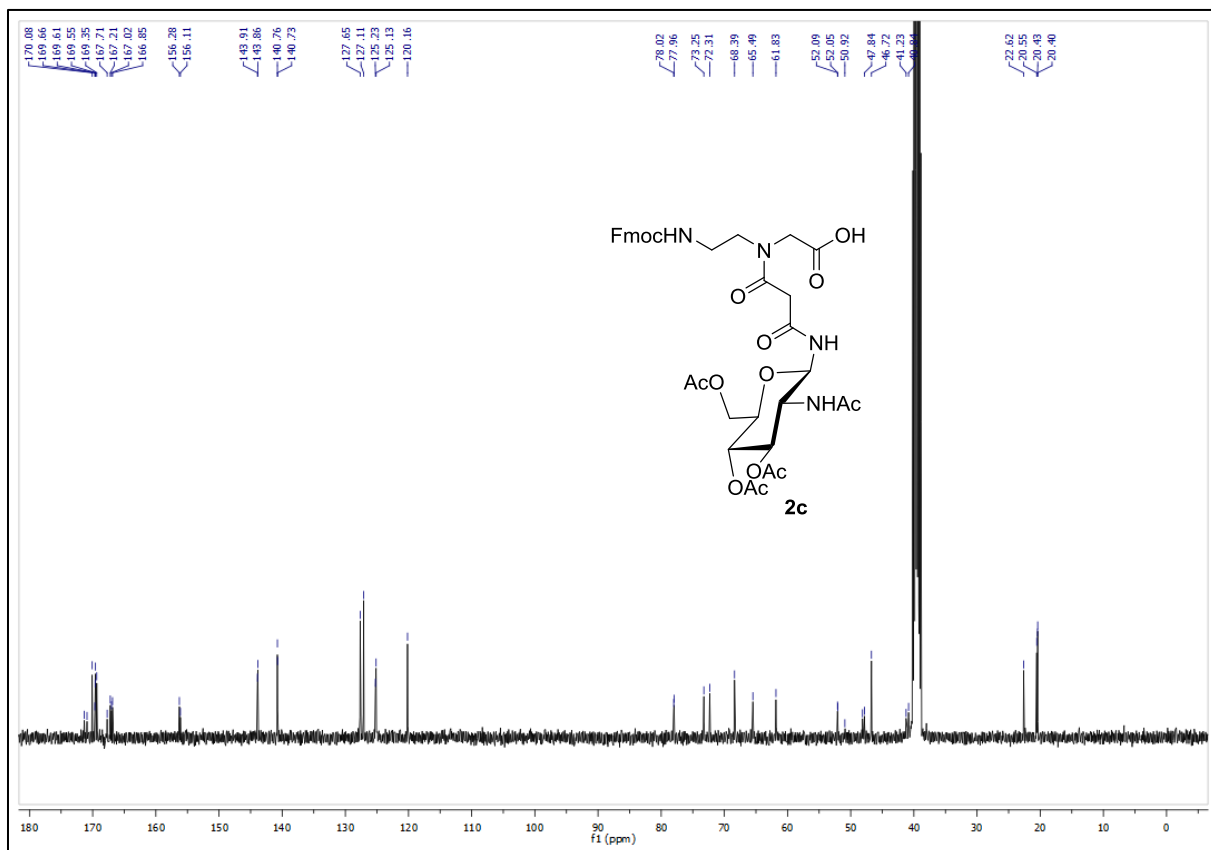

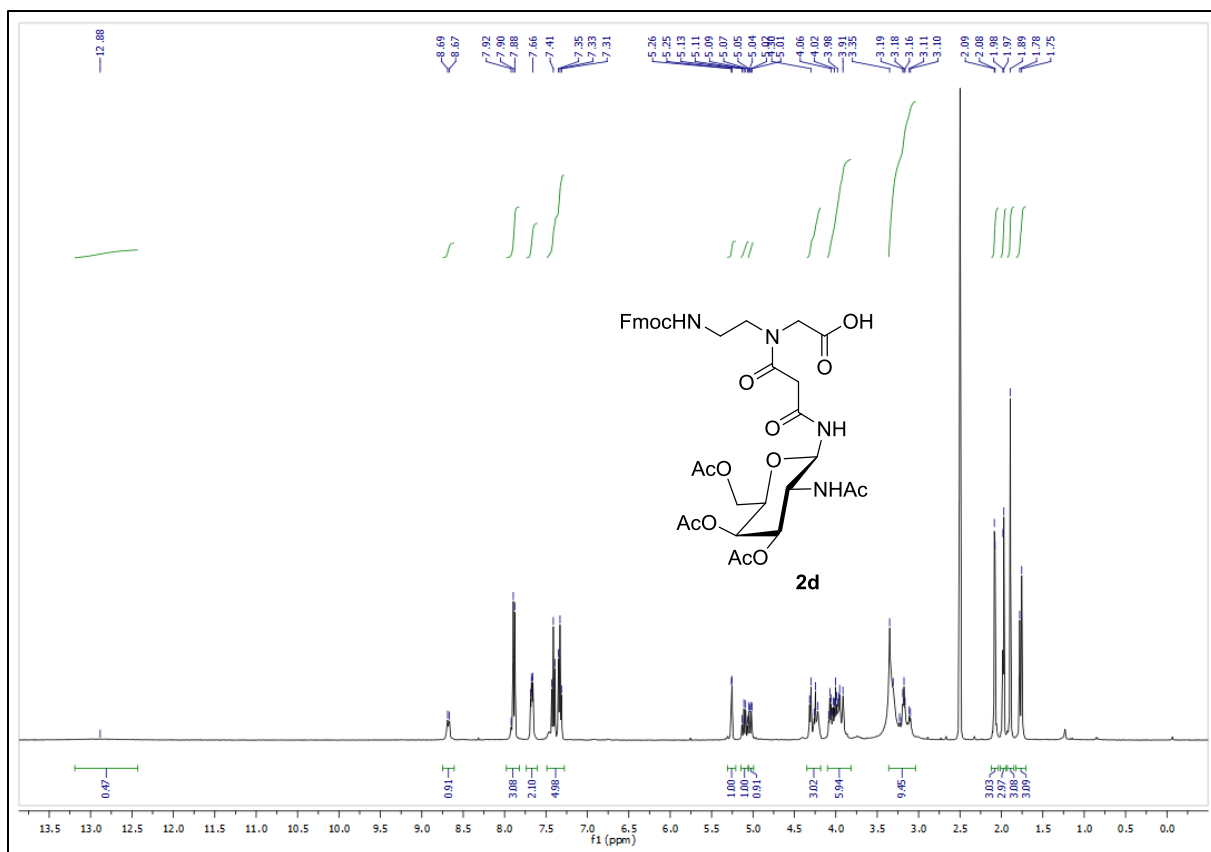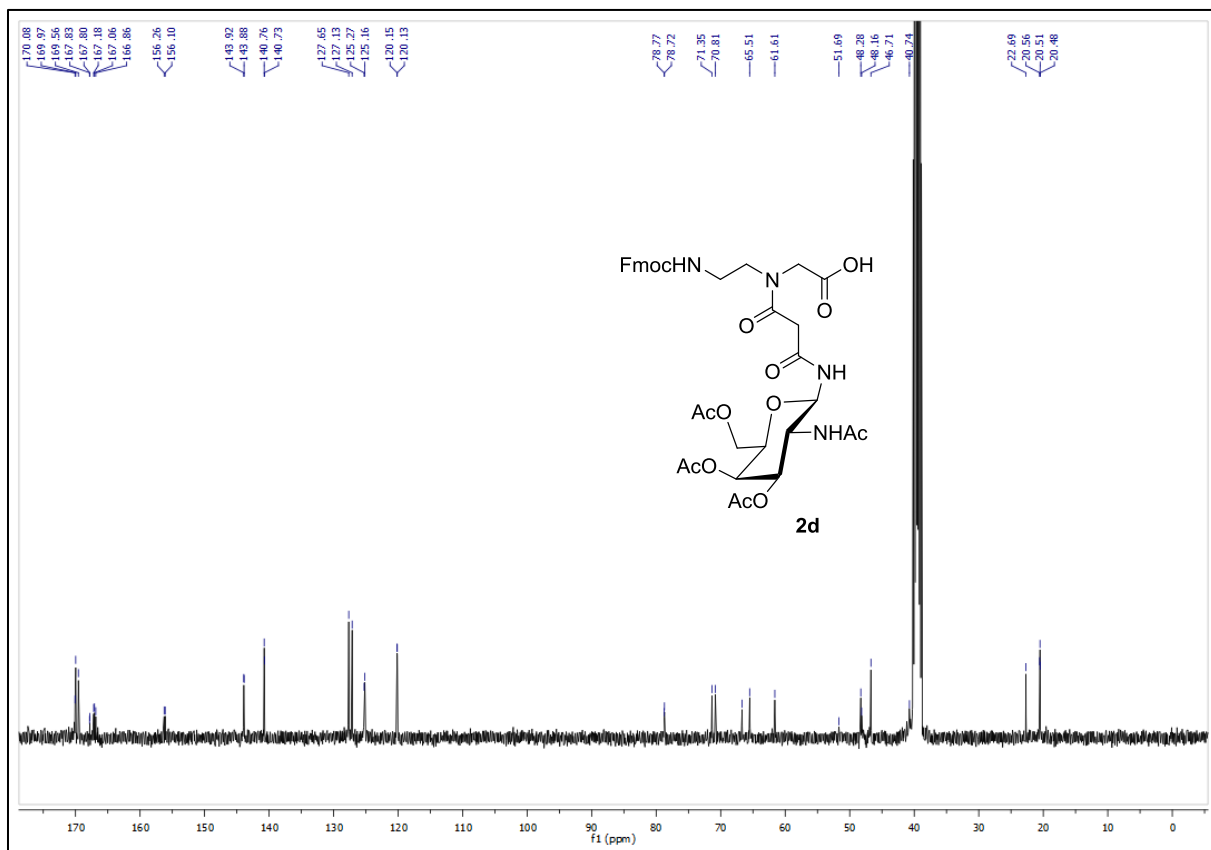

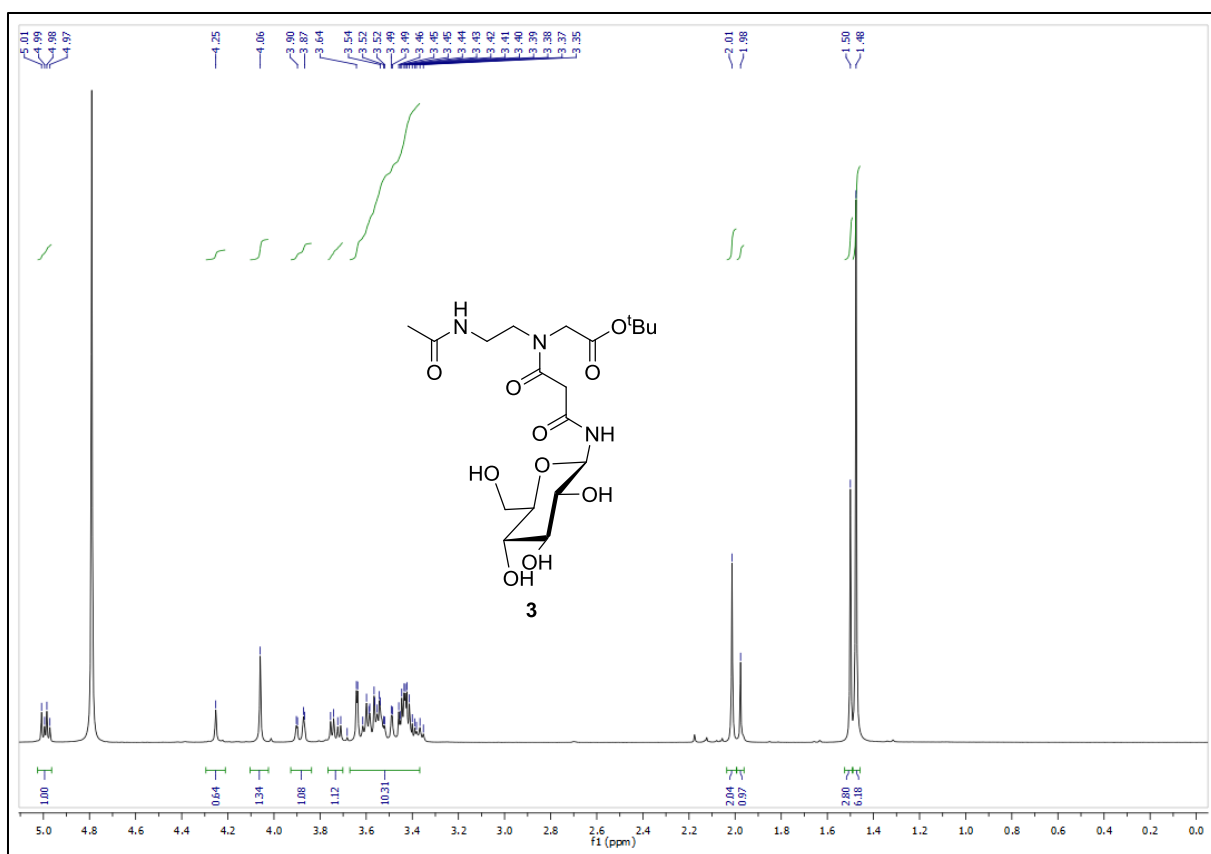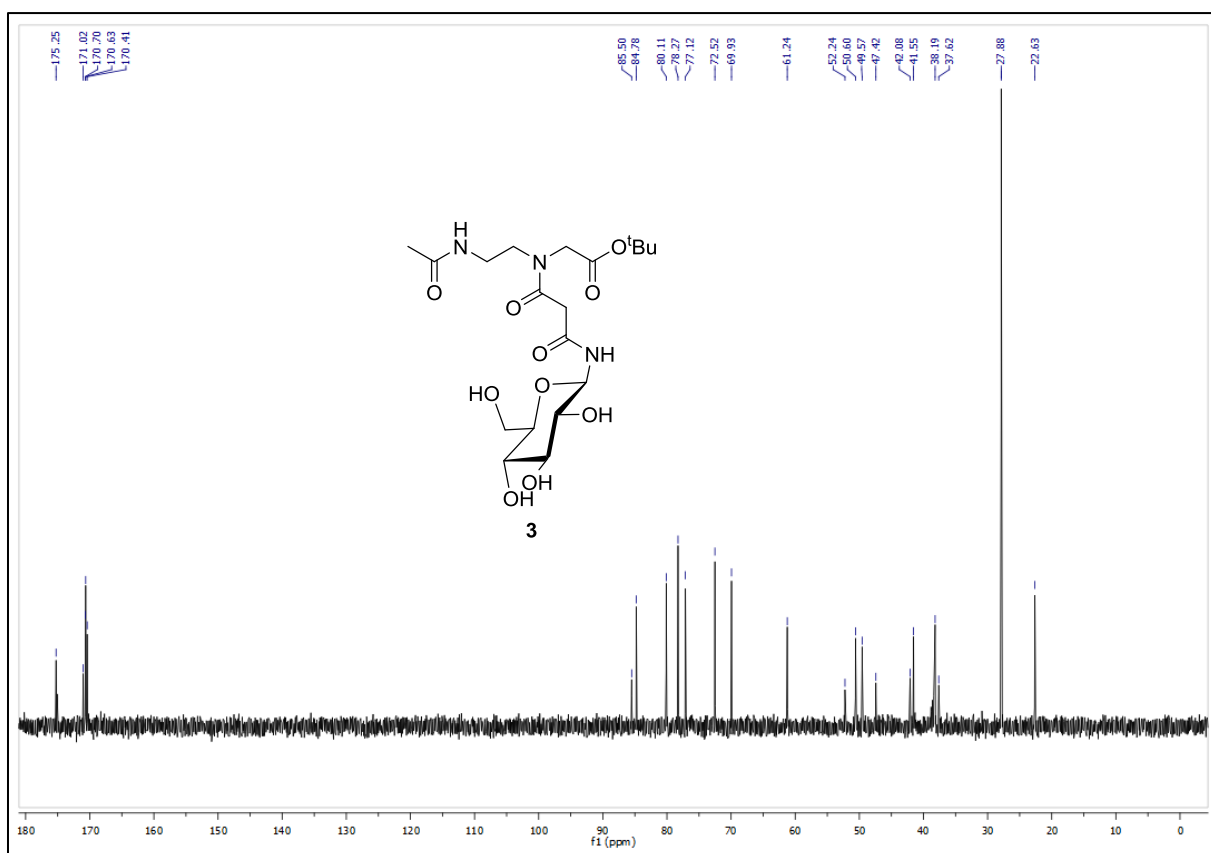

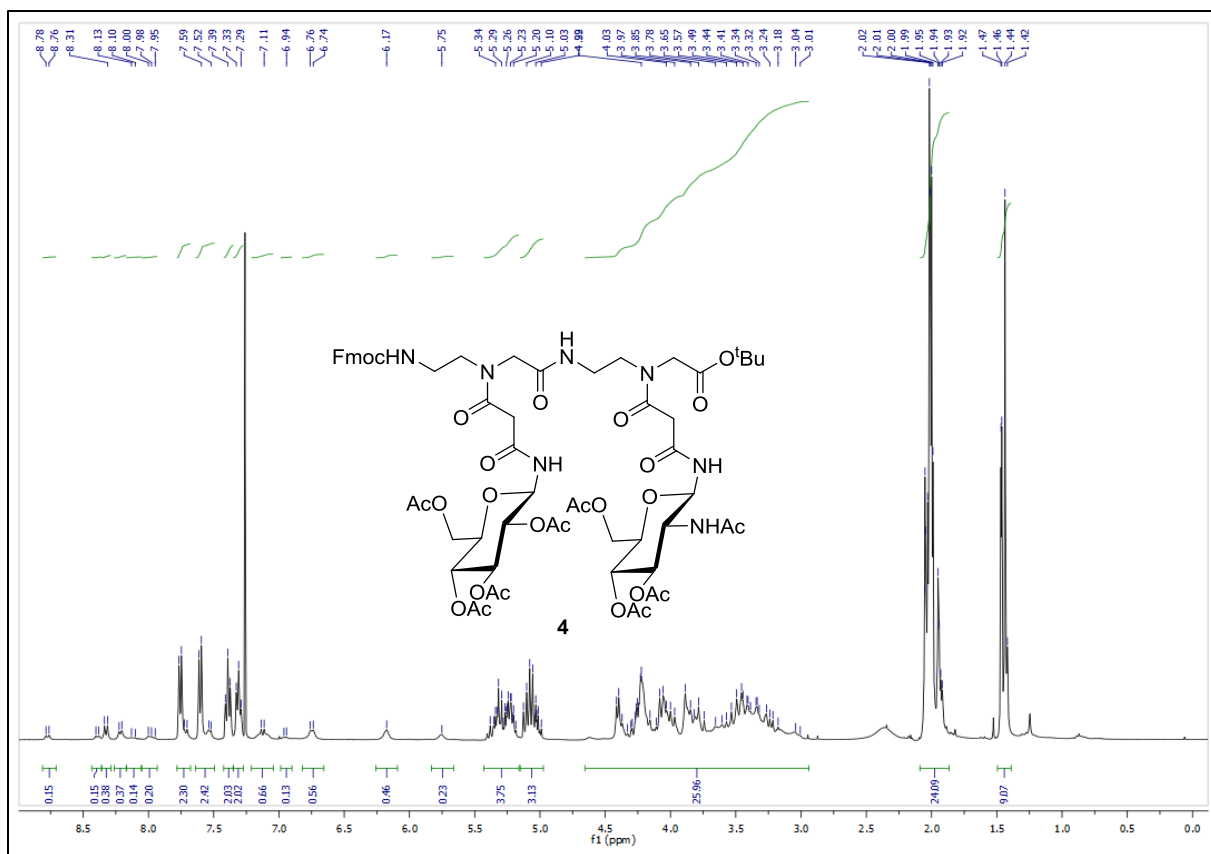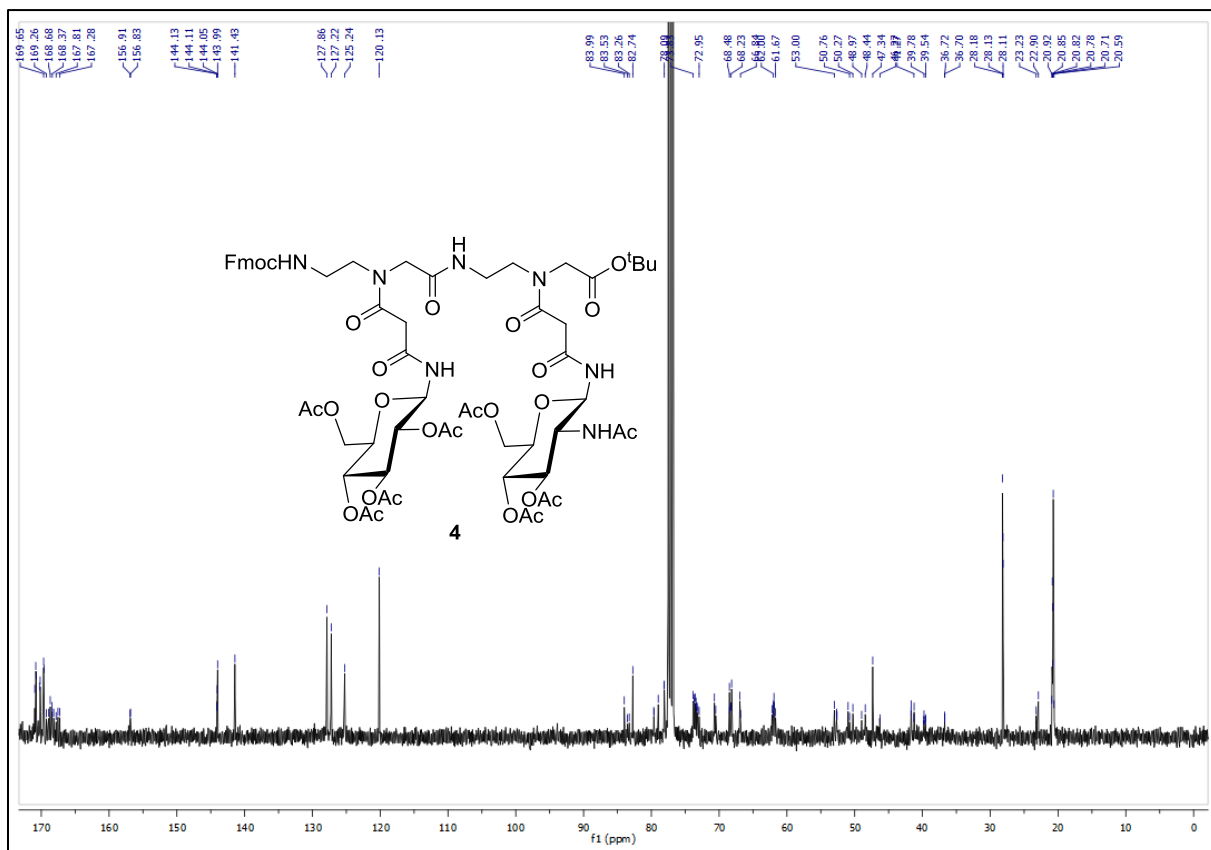

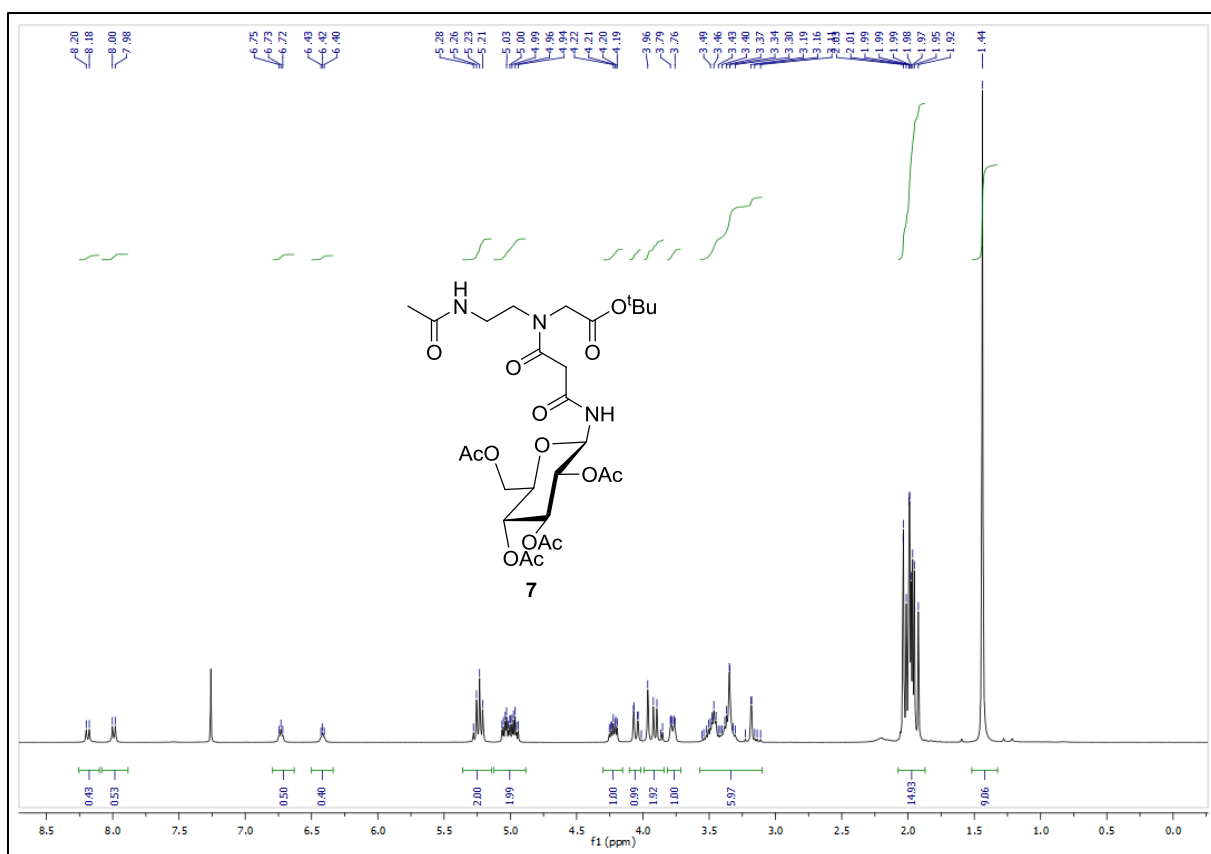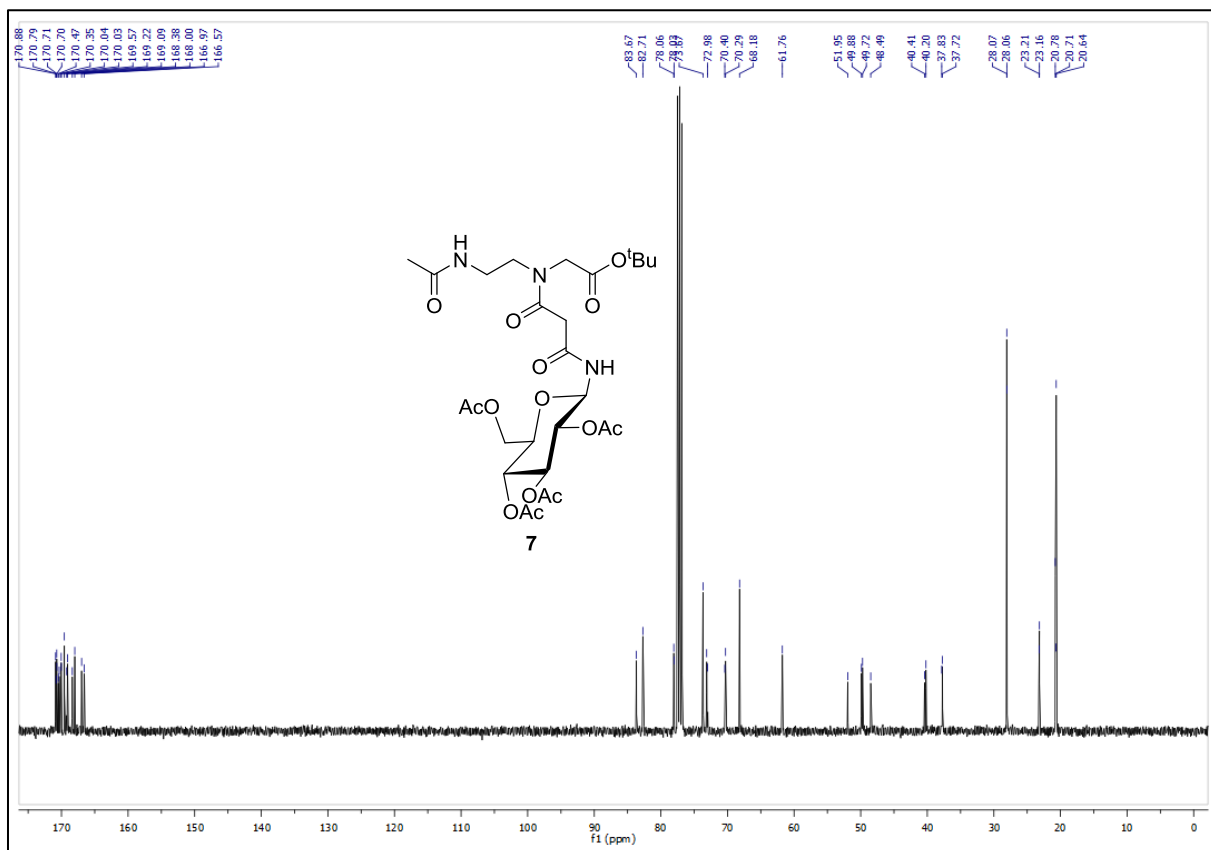

## 2D NMR Spectra of building block 1a

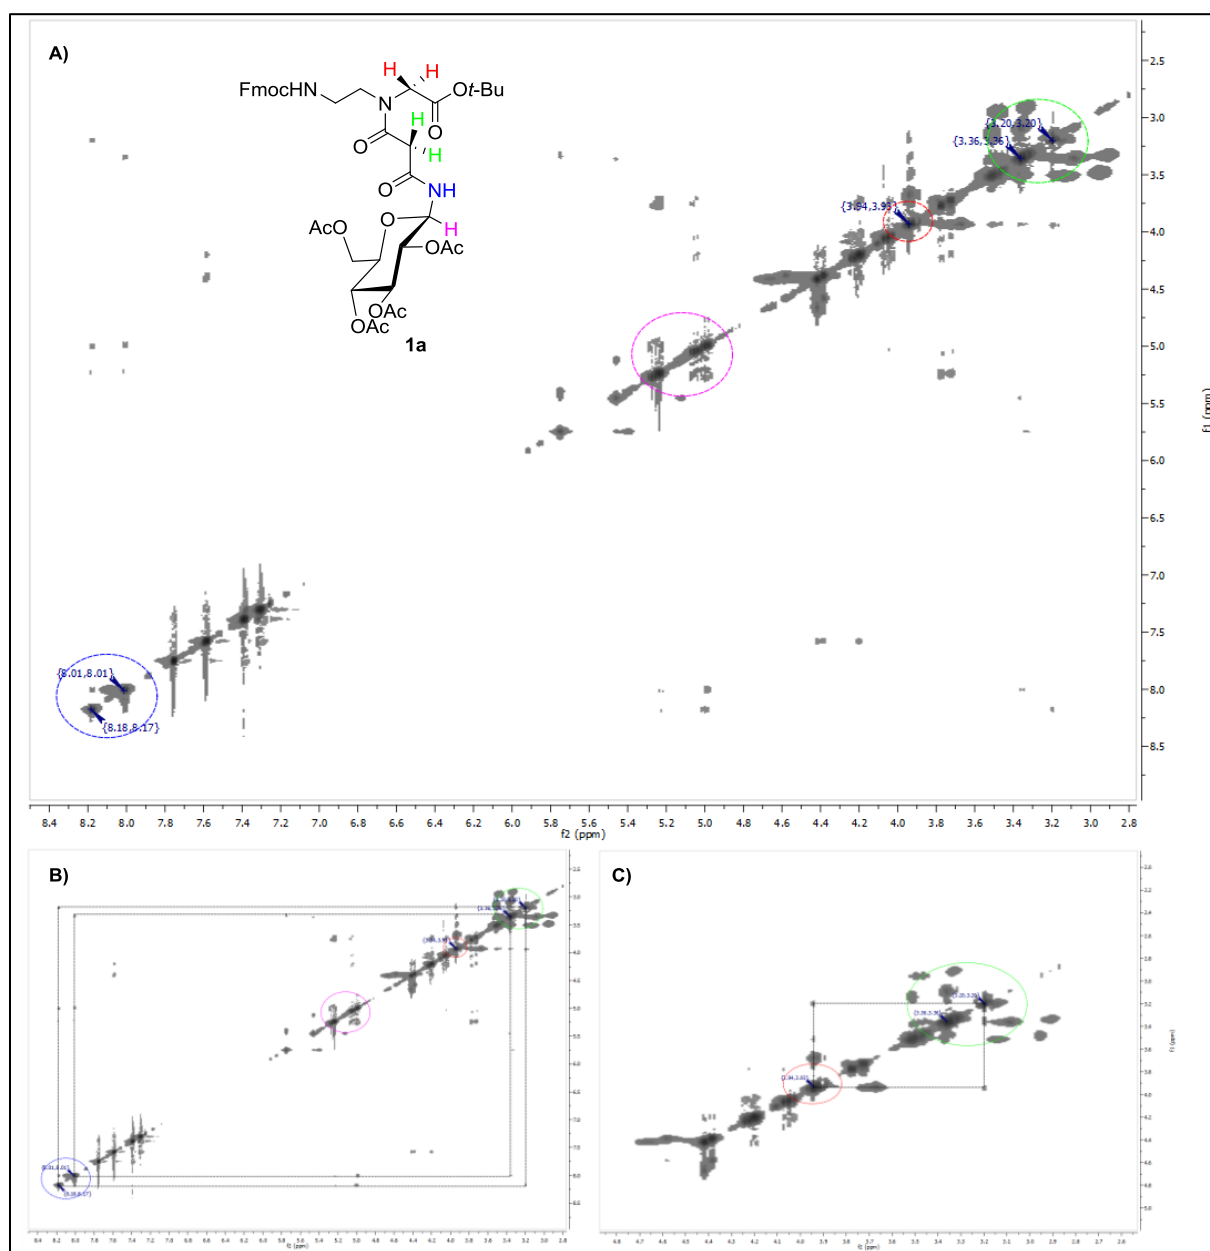

**A)** 2D-NOESY (600 MHz;  $\tau_m = 450$  ms) spectrum of building block **1a** in  $\text{CDCl}_3$ ; **B)** Crosspeaks of the amidic doublets (blue) and the malonyl protons (green); **C)** Crosspeaks of the methylene protons of the PNA backbone (red) and the malonyl protons (green).
